# Supplementary material for: Brain Protein Expression Profile Confirms the Protective Effect of the ACTH(4–7)PGP Peptide (Semax) in a Rat Model of Cerebral Ischemia–Reperfusion
Source: MDPI journal article supplement (doi:10.3390/ijms22126179), 2021-06-08
Supplement: s1 [file s1]

**Supplementary Figure S3. The complete raw images of the blots**

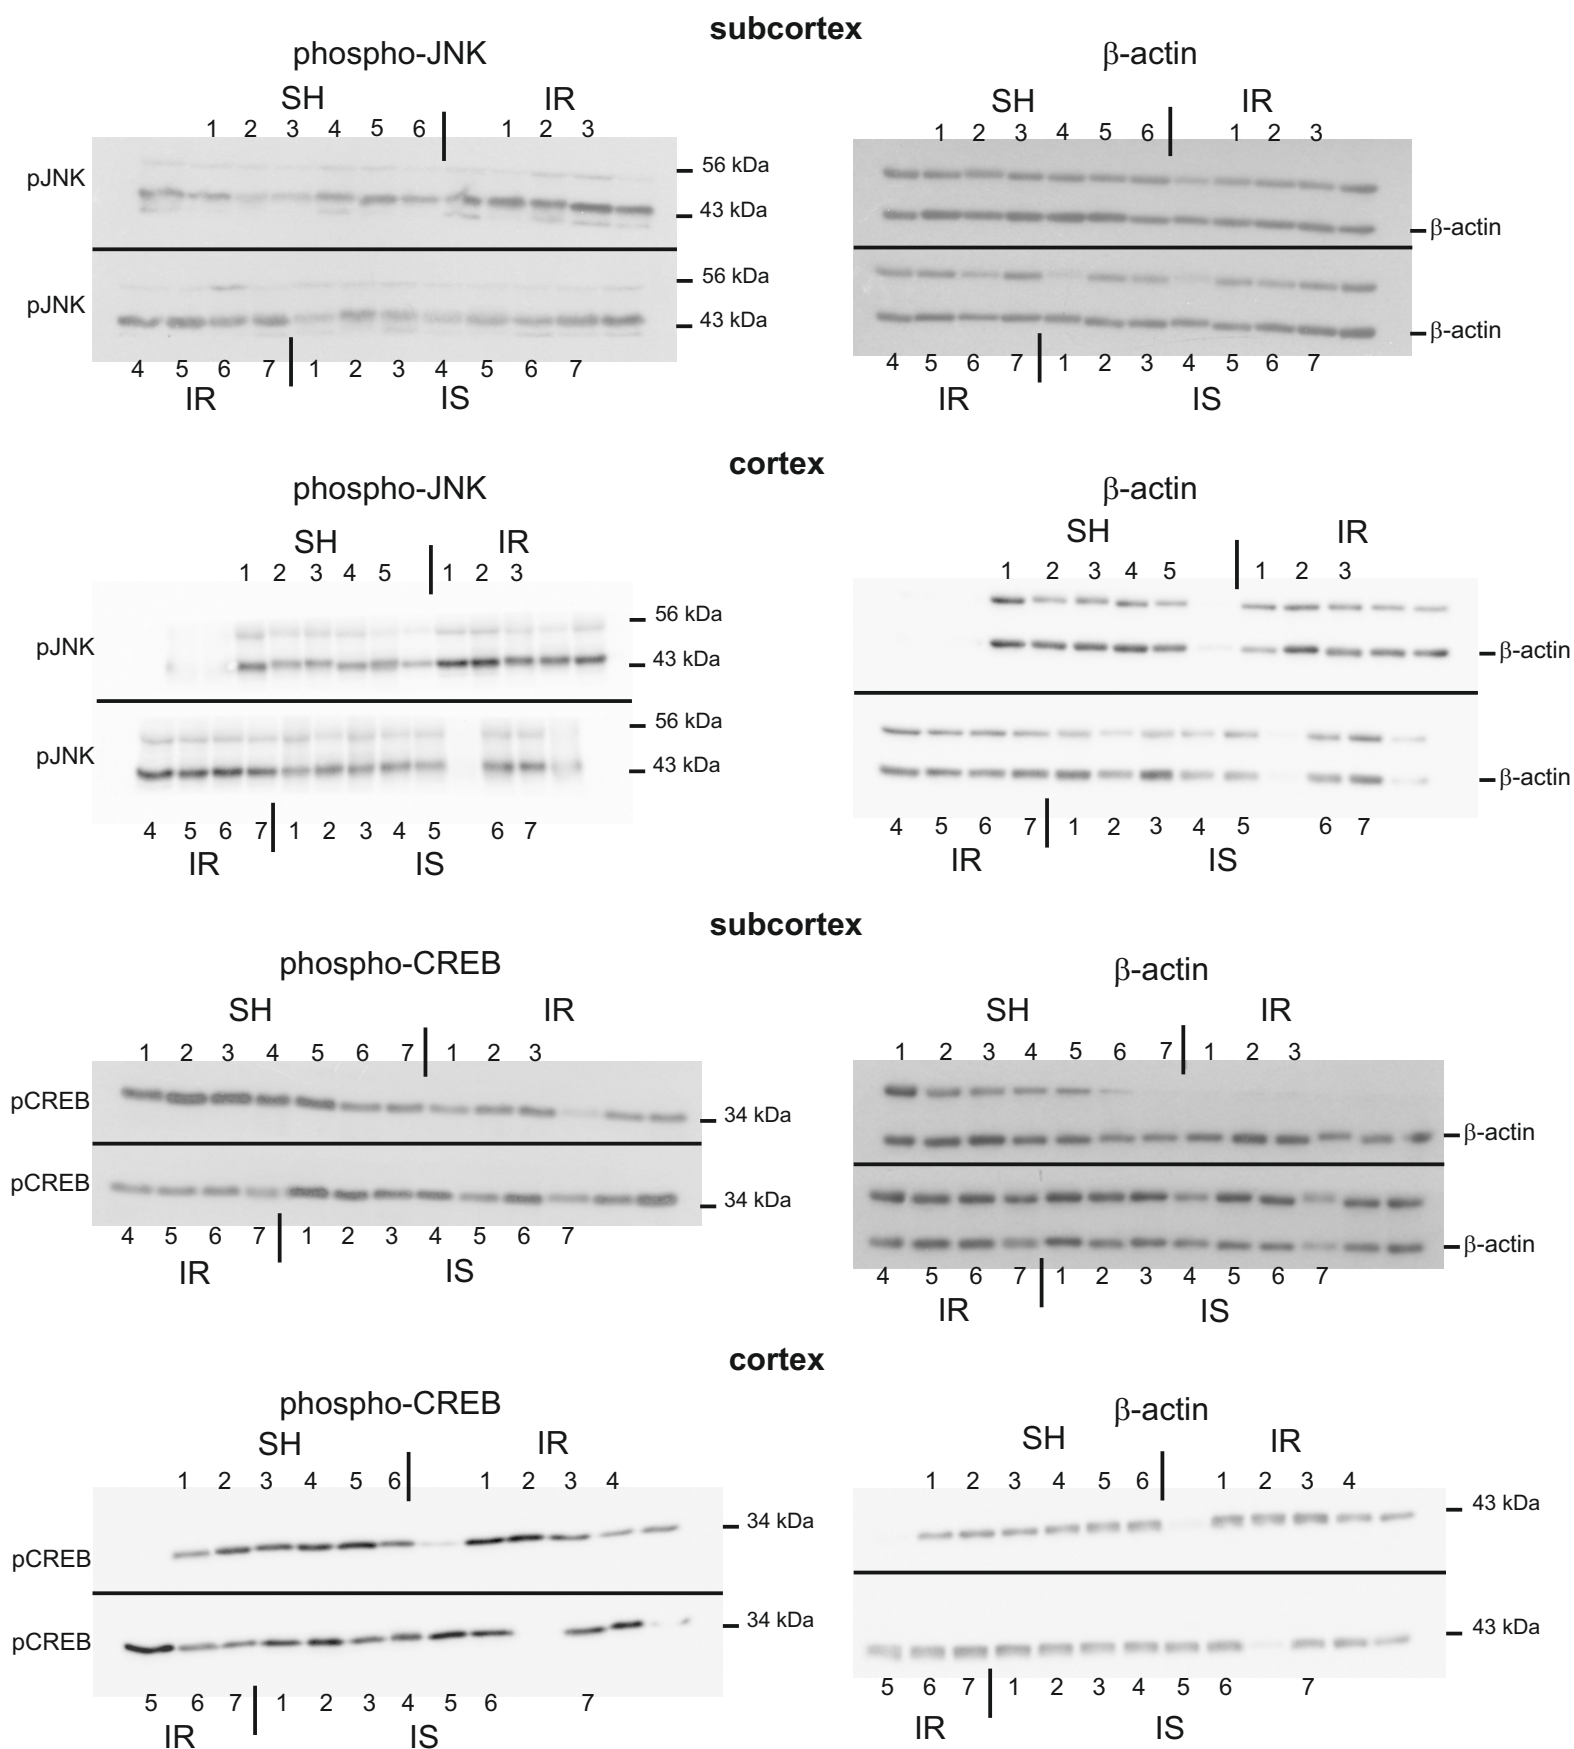

Original immunoblots of active JNK and CREB in the subcortex and cortex in SH, IR and IS groups (n = 5-7) are shown to the left. Corresponding immunoblots of  $\beta$ -actin are shown to the right. The numbers indicate the lane numbers in each group that were used for the semi-quantitative analysis.

### subcortex

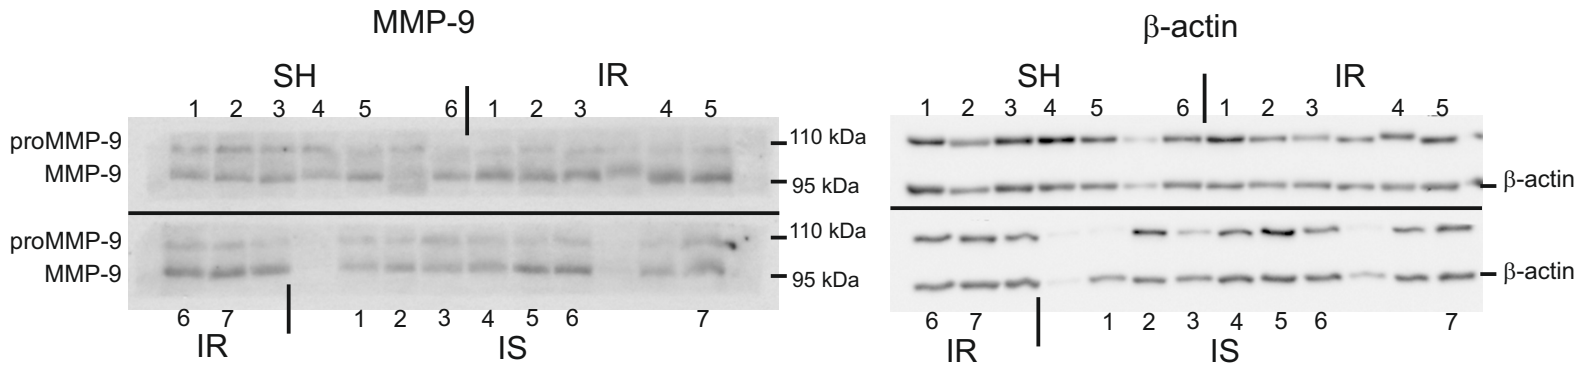

### cortex

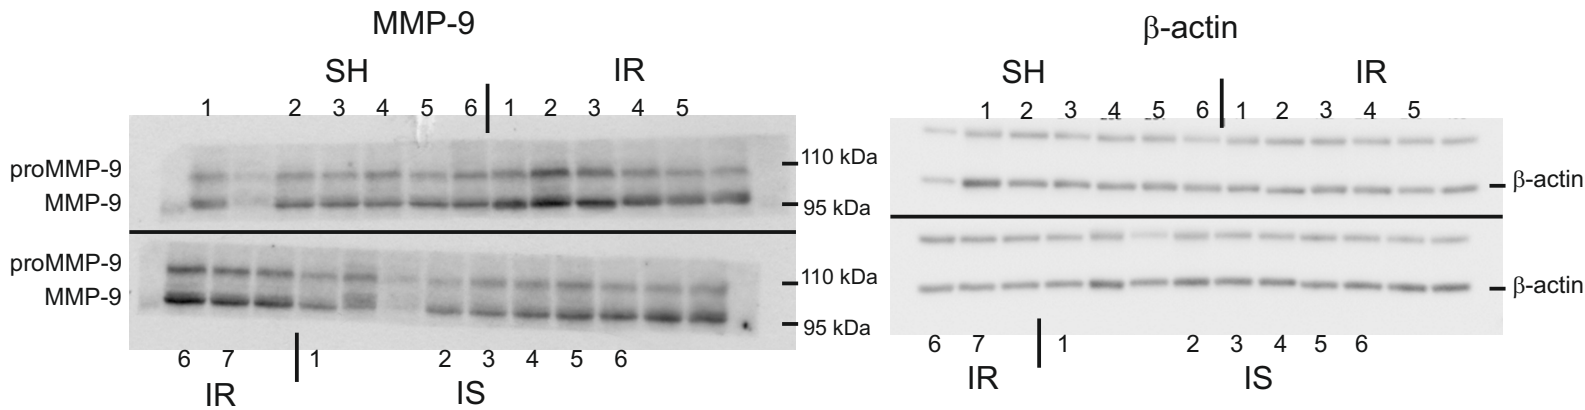

### subcortex

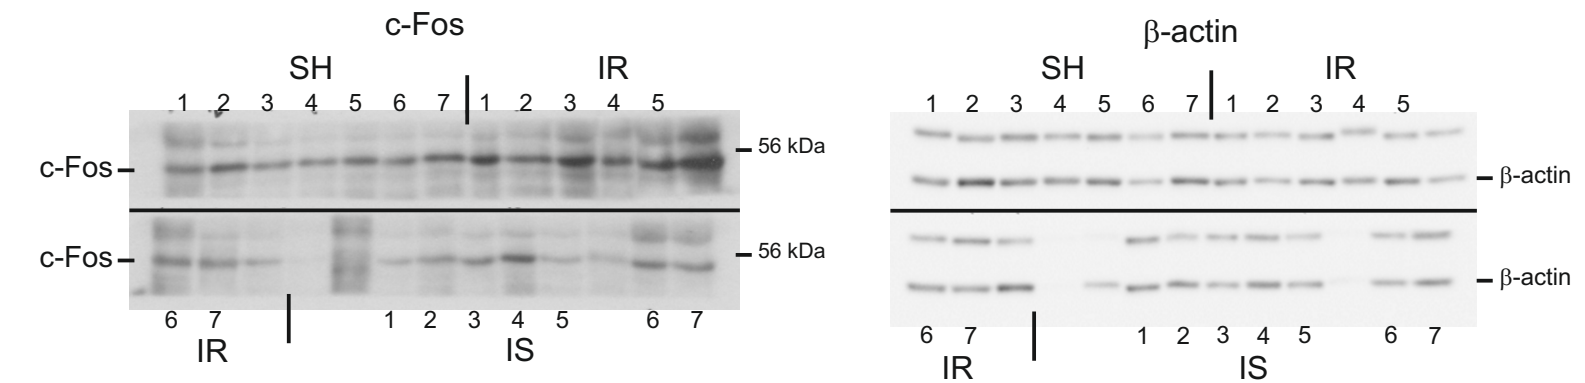

### cortex

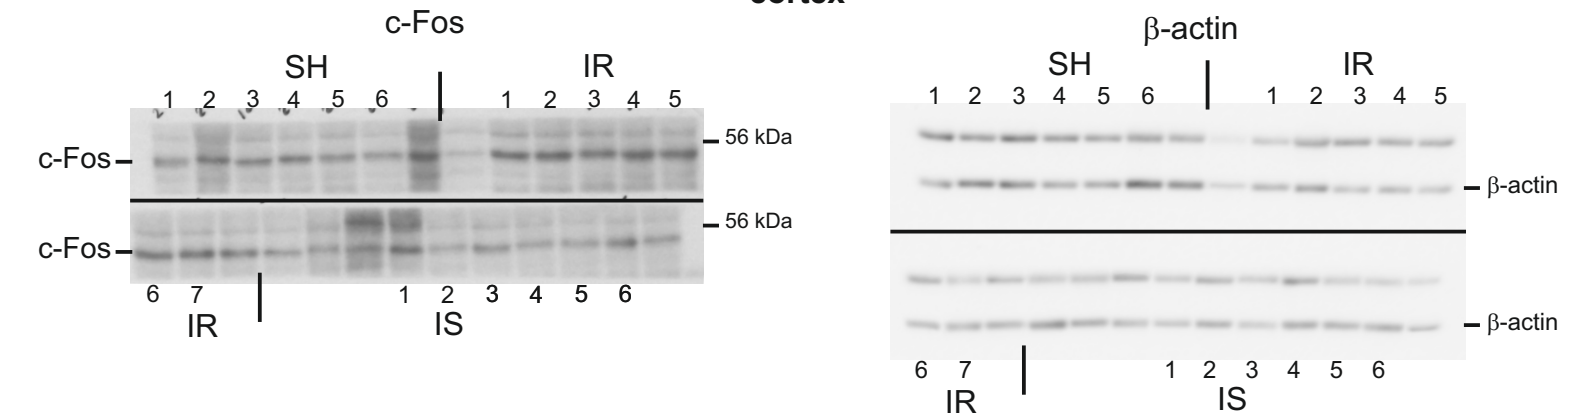

Original immunoblots of MMP-9 and c-Fos in the subcortex and cortex in SH, IR and IS groups (n = 5-7) are shown to the left. Corresponding immunoblots of  $\beta$ -actin are shown to the right. The numbers indicate the lane numbers in each group that were used for the semi-quantitative analysis.
