# Supplementary material for: Brain Protein Expression Profile Confirms the Protective Effect of the ACTH(4–7)PGP Peptide (Semax) in a Rat Model of Cerebral Ischemia–Reperfusion
Source: MDPI journal article supplement (doi:10.3390/ijms22126179), 2021-06-08
Supplement: s1 [file s1]

**Supplementary Figure S2. MRI of ischemic foci after tMCAO.**

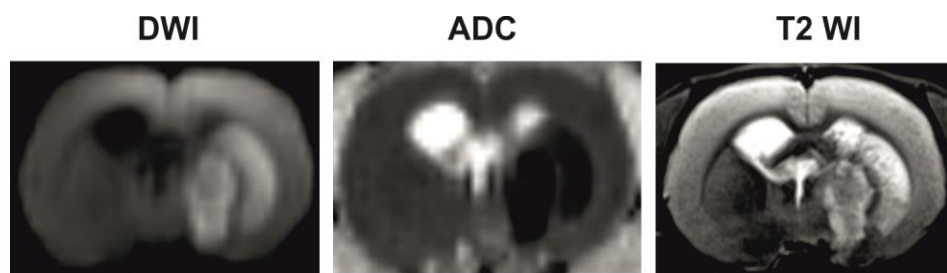

DWI with an ADC map and T2 WI scans of the formation of ischemic injury areas with a subcortical localization in the brain of rats at 24 h after tMCAO.
