# Supplementary material for: Brain Protein Expression Profile Confirms the Protective Effect of the ACTH(4–7)PGP Peptide (Semax) in a Rat Model of Cerebral Ischemia–Reperfusion
Source: MDPI journal article supplement (doi:10.3390/ijms22126179), 2021-06-08
Supplement: s1 [file s1]

**Supplementary Figure S1. Experimental design.**

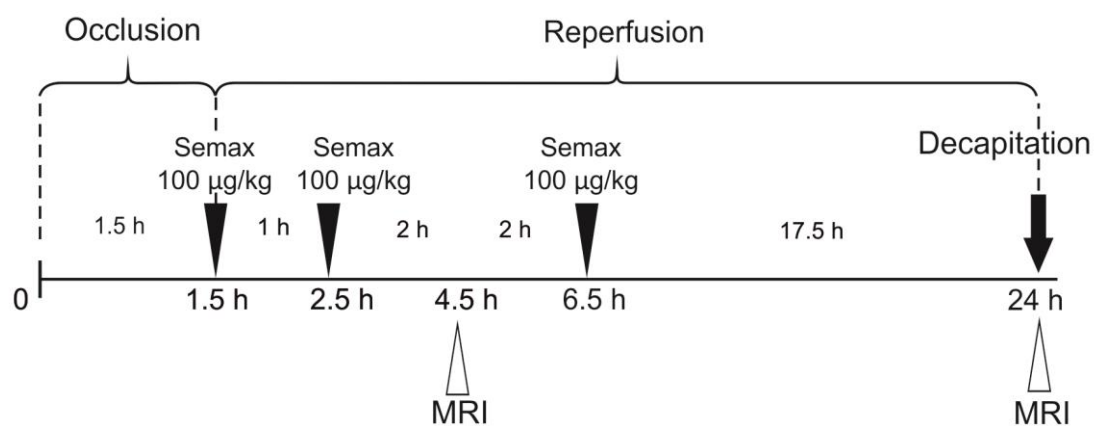

In the rat tMCAO model, the time intervals between the onset of occlusion, reperfusion, Semax injections, MRI diagnostics, and decapitation of animals are indicated.
