# Supplementary material for: Brain Protein Expression Profile Confirms the Protective Effect of the ACTH(4–7)PGP Peptide (Semax) in a Rat Model of Cerebral Ischemia–Reperfusion
Source: Int J Mol Sci. 2021 Jun 8;22(12):6179. doi: 10.3390/ijms22126179 (PMC8226508; doi:10.3390/ijms22126179)
Supplement: Supplementary file 1 [file ijms-22-06179-s001.zip]

Archive with 4 entries (4 files):
- Supplementary Figure S1.pdf
- Supplementary Figure S2.pdf
- Supplementary Figure S3.pdf
- Supplementary Table S1.xlsx
