# Supplementary material for: Brain Protein Expression Profile Confirms the Protective Effect of the ACTH(4–7)PGP Peptide (Semax) in a Rat Model of Cerebral Ischemia–Reperfusion
Source: Int J Mol Sci. 2021 Jun 8;22(12):6179. doi: 10.3390/ijms22126179 (PMC8226508; doi:10.3390/ijms22126179)
Supplement: Supplementary file 1 [file ijms-22-06179-s001.zip › Supplementary Table S1.xlsx]

## Sheet: Лист1
Table S1. The characterization of the primers for real-time RT-PCR
Gene symbol	Primer (5'-3')	RefSeq ID	Amplicon size (bp)	Effectiveness ± standart error
Fos	F: TGAAGAGGAAGAGAAACGGAGA	NM_022197.2	302	1,89±0
	R: ACTCTGGGGTGGTAGCCTCA
Mmp9	F: ATCCGCAGTCCAAGAAGAT	NM_031055	334	1,92±0,03
	R: AAACTCACACGCCAGAAGTATT
Gapdh	F: ACTCTACCCACGGCAAGTTCAACG	NM_017008.4	148	2,01±0,03
	R: GTAGACTCCACGACATACTCAGCAC
Rpl3	F: ATGGGTCCTTGGGCTTCTTG	NM_198753.2	239	1,9±0
	R: CACAATACCCACAACCACCA
